# Supplementary material
Source: PubMed Central journal article supplement (PMC4509492)
Supplement: Supp_Figure1.pdf [file Supp_Figure1.pdf]

## Supplementary Data

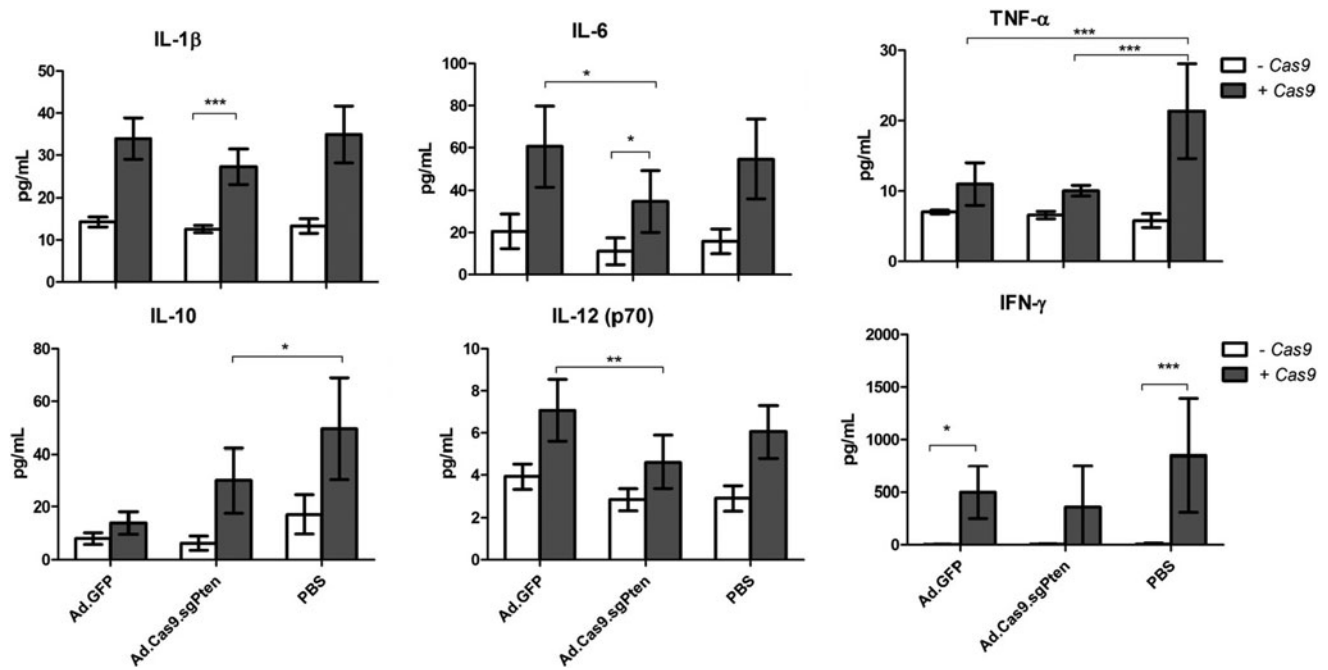

**Supplementary Figure S1.** Cytokine release from cultured splenocytes isolated from PBS-, Ad.GFP-, or Ad.sgPten-infected mice 14 days p.i. with (gray bars) or without (white bars) SpCas9 stimulation.
