# Supplementary material
Source: PubMed Central journal article supplement (PMC4509492)
Supplement: Supp_Table1.pdf [file Supp_Table1.pdf]

**Supplementary Table S1. Indels identified by deep sequencing.**

**Mouse #1**

| Name     | Reference  | Position | Ref | Indel        | ReadsSupportingRef | ReadsSupportingIndel | VarFreq |
|----------|------------|----------|-----|--------------|--------------------|----------------------|---------|
| D14-8355 | Pten_345bp | 116      | T   | */-AGCAGAAA  | 7019               | 27                   | 0.38%   |
| D14-8355 | Pten_345bp | 118      | G   | */-CAGAAA    | 7343               | 26                   | 0.35%   |
| D14-8355 | Pten_345bp | 119      | C   | */-AGAAACAAA | 7221               | 16                   | 0.22%   |
| D14-8355 | Pten_345bp | 121      | G   | */-A         | 6925               | 193                  | 2.65%   |
| D14-8355 | Pten_345bp | 121      | G   | */-AA        | 6925               | 54                   | 0.74%   |
| D14-8355 | Pten_345bp | 121      | G   | */-AAA       | 6925               | 29                   | 0.40%   |
| D14-8355 | Pten_345bp | 121      | G   | */-AAAC      | 6925               | 18                   | 0.25%   |
| D14-8355 | Pten_345bp | 121      | G   | */+A         | 6925               | 31                   | 0.43%   |
| D14-8355 | Pten_345bp | 122      | A   | */-AAC       | 6585               | 23                   | 0.35%   |
| D14-8355 | Pten_345bp | 123      | A   | */-AC        | 6278               | 42                   | 0.66%   |
| D14-8355 | Pten_345bp | 124      | A   | */-C         | 5888               | 50                   | 0.79%   |
| D14-8355 | Pten_345bp | 124      | A   | */+C         | 5888               | 372                  | 5.87%   |
| D14-8355 | Pten_345bp | 125      | C   | */-A         | 6633               | 41                   | 0.60%   |
| D14-8355 | Pten_345bp | 125      | C   | */-AA        | 6633               | 15                   | 0.22%   |
| D14-8355 | Pten_345bp | 125      | C   | */-AAA       | 6633               | 18                   | 0.26%   |
| D14-8355 | Pten_345bp | 125      | C   | */+A         | 6633               | 32                   | 0.47%   |
| D14-8355 | Pten_345bp | 237      | G   | */-A         | 7385               | 17                   | 0.23%   |
|          |            |          |     |              |                    | Total                | 14.87%  |

**Mouse #2**

| Name     | Reference  | Position | Ref | Indel          | ReadsSupportingRef | ReadsSupportingIndel | VarFreq |
|----------|------------|----------|-----|----------------|--------------------|----------------------|---------|
| D14-8356 | Pten_345bp | 112      | T   | */-CGTTAGCAGAA | 7399               | 37                   | 0.50%   |
| D14-8356 | Pten_345bp | 115      | T   | */-TAGCAGAAA   | 6984               | 18                   | 0.25%   |
| D14-8356 | Pten_345bp | 116      | T   | */-AGCAGAA     | 6865               | 33                   | 0.47%   |
| D14-8356 | Pten_345bp | 116      | T   | */-AGCAGAAA    | 6865               | 41                   | 0.58%   |
| D14-8356 | Pten_345bp | 118      | G   | */-CAGAAA      | 7201               | 26                   | 0.36%   |
| D14-8356 | Pten_345bp | 119      | C   | */-AGAAACAAAA  | 7082               | 21                   | 0.29%   |
| D14-8356 | Pten_345bp | 119      | C   | */-AGAA        | 7082               | 20                   | 0.28%   |
| D14-8356 | Pten_345bp | 121      | G   | */-A           | 6670               | 206                  | 2.91%   |

|          |            |     |   |               |      |       |        |
|----------|------------|-----|---|---------------|------|-------|--------|
| D14-8356 | Pten_345bp | 121 | G | */-AA         | 6670 | 74    | 1.04%  |
| D14-8356 | Pten_345bp | 121 | G | */-AAA        | 6670 | 37    | 0.52%  |
| D14-8356 | Pten_345bp | 121 | G | */-AAAC       | 6670 | 32    | 0.45%  |
| D14-8356 | Pten_345bp | 121 | G | */-AAACA      | 6670 | 24    | 0.34%  |
| D14-8356 | Pten_345bp | 122 | A | */-AAC        | 6334 | 33    | 0.52%  |
| D14-8356 | Pten_345bp | 123 | A | */-AC         | 6061 | 43    | 0.70%  |
| D14-8356 | Pten_345bp | 124 | A | */-C          | 5514 | 77    | 1.25%  |
| D14-8356 | Pten_345bp | 124 | A | */-CAAAAGGAG/ | 5514 | 17    | 0.28%  |
| D14-8356 | Pten_345bp | 124 | A | */+C          | 5514 | 534   | 8.68%  |
| D14-8356 | Pten_345bp | 125 | C | */-A          | 6154 | 36    | 0.56%  |
| D14-8356 | Pten_345bp | 125 | C | */-AAAAGGAGAT | 6154 | 22    | 0.34%  |
| D14-8356 | Pten_345bp | 125 | C | */-AA         | 6154 | 20    | 0.31%  |
| D14-8356 | Pten_345bp | 125 | C | */-AAA        | 6154 | 17    | 0.26%  |
| D14-8356 | Pten_345bp | 125 | C | */-AAAAGG     | 6154 | 21    | 0.33%  |
| D14-8356 | Pten_345bp | 125 | C | */-AAAAGGA    | 6154 | 23    | 0.36%  |
| D14-8356 | Pten_345bp | 125 | C | */-AAAAGGAG   | 6154 | 22    | 0.34%  |
| D14-8356 | Pten_345bp | 125 | C | */+A          | 6154 | 42    | 0.65%  |
| D14-8356 | Pten_345bp | 237 | G | */-A          | 7405 | 16    | 0.21%  |
|          |            |     |   |               |      | Total | 22.78% |
